# Supplementary material
Source: publisher figshare collection journal article supplement (https://tandf.figshare.com/articles/dataset/_/20537781)
Supplement: Supplementary file 1 [file 1]

# Online Appendix

Table 1: Conjoint experiment treatments. For an implementation example, consult the attached questionnaire (questionnaire page 2), in this Appendix.

Conjoint attributes and values. DV: Which of the algorithms should be prohibited ?

---

**Privacy protection**

Requires to reveal personal information with consent  
Gathers personal information without consent  
Can customize whether personal information collected or not

---

**Risk of unemployment**

Very low risk of unemployment for you and others due to automation  
Somewhat low risk of unemployment for you and others due to automation  
Somewhat high risk of unemployment for you and others due to automation  
Very high risk of unemployment for you and others due to automation

---

**Jobs creation**

Does not create new jobs  
Creates new jobs that benefit college educated professionals only - for example diagnosis specialist  
Creates new jobs that benefit manual labour and non-college occupations - for example robotics operator  
Creates new jobs that benefit all professions and occupations

---

**Discrimination**

Somewhat high risk to recreate human biases and discrimination  
Acts neutral without bias or discrimination

---

**Transparency**

Algorithm can be explained to 5th grader  
Only experts can understand algorithm  
Nobody can understand how decisions are made

---

**Decision area**

Medical decisions on health and well-being  
Advertising and consumer goods  
Manufacturing and production  
Financial services and banking  
Security and surveillance  
Public administration

---

**Choices made in dilemma**

Chooses between helping humans or saving money  
Chooses between helping humans or other humans  
Chooses between spending money on one thing or spending money on another thing  
Does not make choices/decisions

---

## Ethics Review

This study has received ethics approval (OE.0034) from the Centre for Experimental Social Sciences (CESS), Nuffield College, in March 2019.

## Additional Analysis

Table 2: AMCE coefficients - Germany

|    | BY | feature | level                   | estimate                    | std.error | z    | p          |
|----|----|---------|-------------------------|-----------------------------|-----------|------|------------|
| 1  | a) | Germany | Privacy                 | customize                   | 0.00      |      |            |
| 2  | a) | Germany | Privacy                 | gather w/o consent          | 0.22      | 0.02 | 9.87 0.00  |
| 3  | a) | Germany | Privacy                 | with consent                | 0.05      | 0.02 | 2.44 0.01  |
| 4  | a) | Germany | Job.creation            | no jobs                     | 0.00      |      |            |
| 5  | a) | Germany | Job.creation            | benefit College edu         | -0.03     | 0.03 | -1.09 0.27 |
| 6  | a) | Germany | Job.creation            | benefit manual labor        | -0.08     | 0.02 | -3.29 0.00 |
| 7  | a) | Germany | Job.creation            | jobs benefit all            | -0.13     | 0.03 | -5.18 0.00 |
| 8  | a) | Germany | Risk.of.unemployment    | very low unempl risk        | 0.00      |      |            |
| 9  | a) | Germany | Risk.of.unemployment    | somewhat low risk           | 0.01      | 0.03 | 0.41 0.68  |
| 10 | a) | Germany | Risk.of.unemployment    | somewhat high risk          | 0.11      | 0.02 | 4.58 0.00  |
| 11 | a) | Germany | Risk.of.unemployment    | very high risk              | 0.15      | 0.02 | 6.27 0.00  |
| 12 | a) | Germany | Example.area.of.use     | advertising                 | 0.00      |      |            |
| 13 | a) | Germany | Example.area.of.use     | finance                     | 0.02      | 0.03 | 0.72 0.47  |
| 14 | a) | Germany | Example.area.of.use     | production                  | -0.01     | 0.03 | -0.42 0.68 |
| 15 | a) | Germany | Example.area.of.use     | medicial                    | 0.05      | 0.03 | 1.52 0.13  |
| 16 | a) | Germany | Example.area.of.use     | public service              | -0.01     | 0.03 | -0.35 0.73 |
| 17 | a) | Germany | Example.area.of.use     | surveillance/safety         | 0.04      | 0.03 | 1.13 0.26  |
| 18 | a) | Germany | Choices.made.in.dilemma | no choices made             | 0.00      |      |            |
| 19 | a) | Germany | Choices.made.in.dilemma | humans vs. money            | 0.06      | 0.03 | 2.28 0.02  |
| 20 | a) | Germany | Choices.made.in.dilemma | humans vs humans            | 0.02      | 0.02 | 0.83 0.41  |
| 21 | a) | Germany | Choices.made.in.dilemma | money vs. money             | 0.04      | 0.03 | 1.68 0.09  |
| 22 | a) | Germany | Transparency            | easy to explain             | 0.00      |      |            |
| 23 | a) | Germany | Transparency            | nobody can understand       | 0.08      | 0.02 | 3.72 0.00  |
| 24 | a) | Germany | Transparency            | only experts can understand | 0.03      | 0.02 | 1.33 0.18  |
| 25 | a) | Germany | Discrimination          | neutral                     | 0.00      |      |            |
| 26 | a) | Germany | Discrimination          | recreate bias               | 0.17      | 0.02 | 9.30 0.00  |
| 27 | a) | Germany | socinsuremajsourc       | 3                           | 0.00      |      |            |
| 28 | a) | Germany | socinsuremajsourc       | 1                           | 0.00      | 0.01 | 0.44 0.66  |
| 29 | a) | Germany | socinsuremajsourc       | 2                           | -0.00     | 0.01 | -0.04 0.96 |
| 30 | a) | Germany | socinsuremajsourc       | 9                           | 0.01      | 0.01 | 1.25 0.21  |
| 31 | a) | Germany | privacyconcern          | 4                           | 0.00      |      |            |
| 32 | a) | Germany | privacyconcern          | 1                           | 0.01      | 0.02 | 0.45 0.65  |
| 33 | a) | Germany | privacyconcern          | 2                           | 0.01      | 0.02 | 0.67 0.50  |
| 34 | a) | Germany | privacyconcern          | 3                           | 0.01      | 0.02 | 0.50 0.62  |
| 35 | a) | Germany | privacyconcern          | 9                           | 0.03      | 0.03 | 0.85 0.39  |
| 36 | a) | Germany | livingstandexp          | 4                           | 0.00      |      |            |
| 37 | a) | Germany | livingstandexp          | 1                           | -0.00     | 0.01 | -0.20 0.84 |
| 38 | a) | Germany | livingstandexp          | 2                           | -0.00     | 0.01 | -0.53 0.60 |
| 39 | a) | Germany | livingstandexp          | 3                           | -0.01     | 0.01 | -0.79 0.43 |
| 40 | a) | Germany | livingstandexp          | 9                           | 0.01      | 0.02 | 0.35 0.73  |
| 41 | a) | Germany | digitalliteracy         | 1                           | 0.00      |      |            |
| 42 | a) | Germany | digitalliteracy         | 2                           | 0.00      | 0.01 | 0.12 0.91  |
| 43 | a) | Germany | digitalliteracy         | 3                           | 0.01      | 0.01 | 1.68 0.09  |

Table 3: AMCE coefficients - UK

|    | BY | feature        | level                   | estimate                    | std.error | z    | p          |
|----|----|----------------|-------------------------|-----------------------------|-----------|------|------------|
| 44 | b) | United Kingdom | Privacy                 | customize                   | 0.00      |      |            |
| 45 | b) | United Kingdom | Privacy                 | gather w/o consent          | 0.14      | 0.03 | 4.33 0.00  |
| 46 | b) | United Kingdom | Privacy                 | with consent                | 0.01      | 0.03 | 0.20 0.85  |
| 47 | b) | United Kingdom | Job.creation            | no jobs                     | 0.00      |      |            |
| 48 | b) | United Kingdom | Job.creation            | benefit College edu         | -0.08     | 0.03 | -2.73 0.01 |
| 49 | b) | United Kingdom | Job.creation            | benefit manual labor        | -0.10     | 0.03 | -3.43 0.00 |
| 50 | b) | United Kingdom | Job.creation            | jobs benefit all            | -0.14     | 0.03 | -4.01 0.00 |
| 51 | b) | United Kingdom | Risk.of.unemployment    | very low unempl risk        | 0.00      |      |            |
| 52 | b) | United Kingdom | Risk.of.unemployment    | somewhat low risk           | 0.04      | 0.03 | 1.19 0.23  |
| 53 | b) | United Kingdom | Risk.of.unemployment    | somewhat high risk          | 0.09      | 0.03 | 3.14 0.00  |
| 54 | b) | United Kingdom | Risk.of.unemployment    | very high risk              | 0.12      | 0.03 | 3.55 0.00  |
| 55 | b) | United Kingdom | Example.area.of.use     | advertising                 | 0.00      |      |            |
| 56 | b) | United Kingdom | Example.area.of.use     | finance                     | -0.01     | 0.04 | -0.12 0.90 |
| 57 | b) | United Kingdom | Example.area.of.use     | production                  | -0.02     | 0.04 | -0.44 0.66 |
| 58 | b) | United Kingdom | Example.area.of.use     | medicial                    | -0.04     | 0.04 | -0.94 0.35 |
| 59 | b) | United Kingdom | Example.area.of.use     | public service              | -0.04     | 0.04 | -0.93 0.35 |
| 60 | b) | United Kingdom | Example.area.of.use     | surveillance/safety         | -0.03     | 0.04 | -0.87 0.38 |
| 61 | b) | United Kingdom | Choices.made.in.dilemma | no choices made             | 0.00      |      |            |
| 62 | b) | United Kingdom | Choices.made.in.dilemma | humans vs. money            | 0.01      | 0.03 | 0.23 0.82  |
| 63 | b) | United Kingdom | Choices.made.in.dilemma | humans vs humans            | 0.01      | 0.03 | 0.32 0.75  |
| 64 | b) | United Kingdom | Choices.made.in.dilemma | money vs. money             | -0.00     | 0.03 | -0.06 0.95 |
| 65 | b) | United Kingdom | Transparency            | easy to explain             | 0.00      |      |            |
| 66 | b) | United Kingdom | Transparency            | nobody can understand       | 0.15      | 0.03 | 5.24 0.00  |
| 67 | b) | United Kingdom | Transparency            | only experts can understand | 0.07      | 0.03 | 2.33 0.02  |
| 68 | b) | United Kingdom | Discrimination          | neutral                     | 0.00      |      |            |
| 69 | b) | United Kingdom | Discrimination          | recreate bias               | 0.10      | 0.02 | 4.46 0.00  |
| 70 | b) | United Kingdom | socinsuremajsourc       | 3                           | 0.00      |      |            |
| 71 | b) | United Kingdom | socinsuremajsourc       | 1                           | 0.00      | 0.01 | 0.50 0.62  |
| 72 | b) | United Kingdom | socinsuremajsourc       | 2                           | 0.01      | 0.01 | 1.25 0.21  |
| 73 | b) | United Kingdom | socinsuremajsourc       | 9                           | 0.00      | 0.01 | 0.03 0.98  |
| 74 | b) | United Kingdom | privacyconcern          | 4                           | 0.00      |      |            |
| 75 | b) | United Kingdom | privacyconcern          | 1                           | 0.01      | 0.01 | 1.74 0.08  |
| 76 | b) | United Kingdom | privacyconcern          | 2                           | 0.02      | 0.01 | 1.91 0.06  |
| 77 | b) | United Kingdom | privacyconcern          | 3                           | 0.01      | 0.01 | 0.97 0.33  |
| 78 | b) | United Kingdom | privacyconcern          | 9                           | 0.01      | 0.02 | 0.37 0.71  |
| 79 | b) | United Kingdom | livingstandexp          | 4                           | 0.00      |      |            |
| 80 | b) | United Kingdom | livingstandexp          | 1                           | -0.01     | 0.01 | -1.25 0.21 |
| 81 | b) | United Kingdom | livingstandexp          | 2                           | -0.01     | 0.01 | -1.51 0.13 |
| 82 | b) | United Kingdom | livingstandexp          | 3                           | -0.01     | 0.01 | -0.74 0.46 |
| 83 | b) | United Kingdom | livingstandexp          | 9                           | 0.00      | 0.02 | 0.30 0.76  |
| 84 | b) | United Kingdom | digitalliteracy         | 1                           | 0.00      |      |            |
| 85 | b) | United Kingdom | digitalliteracy         | 2                           | 0.01      | 0.01 | 1.26 0.21  |
| 86 | b) | United Kingdom | digitalliteracy         | 3                           | 0.01      | 0.01 | 1.99 0.05  |

Table 4: AMCE coefficients - China

|     | BY       | feature                 | level                       | estimate | std.error | z     | p    |
|-----|----------|-------------------------|-----------------------------|----------|-----------|-------|------|
| 87  | c) China | Privacy                 | customize                   | 0.00     |           |       |      |
| 88  | c) China | Privacy                 | gather w/o consent          | 0.09     | 0.03      | 2.68  | 0.01 |
| 89  | c) China | Privacy                 | with consent                | -0.05    | 0.03      | -1.69 | 0.09 |
| 90  | c) China | Job.creation            | no jobs                     | 0.00     |           |       |      |
| 91  | c) China | Job.creation            | benefit College edu         | -0.10    | 0.04      | -2.64 | 0.01 |
| 92  | c) China | Job.creation            | benefit manual labor        | -0.11    | 0.04      | -2.64 | 0.01 |
| 93  | c) China | Job.creation            | jobs benefit all            | -0.13    | 0.04      | -3.33 | 0.00 |
| 94  | c) China | Risk.of.unemployment    | very low unempl risk        | 0.00     |           |       |      |
| 95  | c) China | Risk.of.unemployment    | somewhat low risk           | 0.02     | 0.04      | 0.56  | 0.57 |
| 96  | c) China | Risk.of.unemployment    | somewhat high risk          | 0.07     | 0.04      | 1.87  | 0.06 |
| 97  | c) China | Risk.of.unemployment    | very high risk              | 0.07     | 0.04      | 1.97  | 0.05 |
| 98  | c) China | Example.area.of.use     | advertising                 | 0.00     |           |       |      |
| 99  | c) China | Example.area.of.use     | finance                     | 0.02     | 0.04      | 0.42  | 0.67 |
| 100 | c) China | Example.area.of.use     | production                  | -0.03    | 0.04      | -0.64 | 0.52 |
| 101 | c) China | Example.area.of.use     | medicial                    | -0.04    | 0.05      | -0.87 | 0.38 |
| 102 | c) China | Example.area.of.use     | public service              | 0.03     | 0.04      | 0.61  | 0.54 |
| 103 | c) China | Example.area.of.use     | surveillance/safety         | 0.04     | 0.05      | 0.88  | 0.38 |
| 104 | c) China | Choices.made.in.dilemma | no choices made             | 0.00     |           |       |      |
| 105 | c) China | Choices.made.in.dilemma | humans vs. money            | -0.01    | 0.03      | -0.23 | 0.82 |
| 106 | c) China | Choices.made.in.dilemma | humans vs humans            | -0.04    | 0.03      | -1.15 | 0.25 |
| 107 | c) China | Choices.made.in.dilemma | money vs. money             | -0.04    | 0.03      | -1.19 | 0.23 |
| 108 | c) China | Transparency            | easy to explain             | 0.00     |           |       |      |
| 109 | c) China | Transparency            | nobody can understand       | 0.09     | 0.03      | 2.68  | 0.01 |
| 110 | c) China | Transparency            | only experts can understand | 0.01     | 0.03      | 0.32  | 0.75 |
| 111 | c) China | Discrimination          | neutral                     | 0.00     |           |       |      |
| 112 | c) China | Discrimination          | recreate bias               | 0.04     | 0.03      | 1.62  | 0.11 |
| 113 | c) China | socinsuremajsourc       | 3                           | 0.00     |           |       |      |
| 114 | c) China | socinsuremajsourc       | 1                           | 0.01     | 0.01      | 0.83  | 0.41 |
| 115 | c) China | socinsuremajsourc       | 2                           | -0.01    | 0.01      | -1.04 | 0.30 |
| 116 | c) China | socinsuremajsourc       | 9                           | -0.01    | 0.01      | -0.44 | 0.66 |
| 117 | c) China | privacyconcern          | 4                           | 0.00     |           |       |      |
| 118 | c) China | privacyconcern          | 1                           | 0.01     | 0.01      | 0.65  | 0.52 |
| 119 | c) China | privacyconcern          | 2                           | 0.01     | 0.01      | 0.88  | 0.38 |
| 120 | c) China | privacyconcern          | 3                           | -0.01    | 0.02      | -0.43 | 0.66 |
| 121 | c) China | privacyconcern          | 9                           | 0.00     |           |       |      |
| 122 | c) China | livingstandexp          | 4                           | 0.00     |           |       |      |
| 123 | c) China | livingstandexp          | 1                           | -0.02    | 0.01      | -1.45 | 0.15 |
| 124 | c) China | livingstandexp          | 2                           | -0.01    | 0.01      | -0.60 | 0.55 |
| 125 | c) China | livingstandexp          | 3                           | -0.00    | 0.01      | -0.37 | 0.71 |
| 126 | c) China | livingstandexp          | 9                           | -0.00    | 0.02      | -0.15 | 0.88 |
| 127 | c) China | digitalliteracy         | 1                           | 0.00     |           |       |      |
| 128 | c) China | digitalliteracy         | 2                           | 0.00     | 0.01      | 0.01  | 0.99 |
| 129 | c) China | digitalliteracy         | 3                           | 0.01     | 0.01      | 0.71  | 0.48 |

Table 5: AMCE coefficients - Chile

|     | BY       | feature                 | level                       | estimate | std.error | z     | p    |
|-----|----------|-------------------------|-----------------------------|----------|-----------|-------|------|
| 130 | d) Chile | Privacy                 | customize                   | 0.00     |           |       |      |
| 131 | d) Chile | Privacy                 | gather w/o consent          | -0.00    | 0.04      | -0.06 | 0.95 |
| 132 | d) Chile | Privacy                 | with consent                | 0.01     | 0.04      | 0.28  | 0.78 |
| 133 | d) Chile | Job.creation            | no jobs                     | 0.00     |           |       |      |
| 134 | d) Chile | Job.creation            | benefit College edu         | -0.05    | 0.04      | -1.06 | 0.29 |
| 135 | d) Chile | Job.creation            | benefit manual labor        | -0.00    | 0.04      | -0.11 | 0.91 |
| 136 | d) Chile | Job.creation            | jobs benefit all            | -0.09    | 0.04      | -2.09 | 0.04 |
| 137 | d) Chile | Risk.of.unemployment    | very low unempl risk        | 0.00     |           |       |      |
| 138 | d) Chile | Risk.of.unemployment    | somewhat low risk           | 0.01     | 0.04      | 0.21  | 0.83 |
| 139 | d) Chile | Risk.of.unemployment    | somewhat high risk          | 0.04     | 0.05      | 0.81  | 0.42 |
| 140 | d) Chile | Risk.of.unemployment    | very high risk              | 0.10     | 0.05      | 2.12  | 0.03 |
| 141 | d) Chile | Example.area.of.use     | advertising                 | 0.00     |           |       |      |
| 142 | d) Chile | Example.area.of.use     | finance                     | 0.08     | 0.05      | 1.49  | 0.14 |
| 143 | d) Chile | Example.area.of.use     | production                  | -0.02    | 0.05      | -0.39 | 0.70 |
| 144 | d) Chile | Example.area.of.use     | medicial                    | 0.03     | 0.06      | 0.50  | 0.61 |
| 145 | d) Chile | Example.area.of.use     | public service              | -0.01    | 0.05      | -0.18 | 0.86 |
| 146 | d) Chile | Example.area.of.use     | surveillance/safety         | 0.07     | 0.05      | 1.32  | 0.19 |
| 147 | d) Chile | Choices.made.in.dilemma | no choices made             | 0.00     |           |       |      |
| 148 | d) Chile | Choices.made.in.dilemma | humans vs. money            | 0.03     | 0.04      | 0.63  | 0.53 |
| 149 | d) Chile | Choices.made.in.dilemma | humans vs humans            | 0.02     | 0.05      | 0.35  | 0.72 |
| 150 | d) Chile | Choices.made.in.dilemma | money vs. money             | 0.01     | 0.05      | 0.28  | 0.78 |
| 151 | d) Chile | Transparency            | easy to explain             | 0.00     |           |       |      |
| 152 | d) Chile | Transparency            | nobody can understand       | 0.08     | 0.04      | 1.93  | 0.05 |
| 153 | d) Chile | Transparency            | only experts can understand | 0.08     | 0.04      | 1.86  | 0.06 |
| 154 | d) Chile | Discrimination          | neutral                     | 0.00     |           |       |      |
| 155 | d) Chile | Discrimination          | recreate bias               | 0.09     | 0.04      | 2.32  | 0.02 |
| 156 | d) Chile | socinsuremajsourc       | 3                           | 0.00     |           |       |      |
| 157 | d) Chile | socinsuremajsourc       | 1                           | 0.03     | 0.01      | 2.10  | 0.04 |
| 158 | d) Chile | socinsuremajsourc       | 2                           | 0.02     | 0.01      | 2.36  | 0.02 |
| 159 | d) Chile | socinsuremajsourc       | 9                           | 0.01     | 0.02      | 0.72  | 0.47 |
| 160 | d) Chile | privacyconcern          | 4                           | 0.00     |           |       |      |
| 161 | d) Chile | privacyconcern          | 1                           | -0.01    | 0.01      | -0.42 | 0.67 |
| 162 | d) Chile | privacyconcern          | 2                           | -0.01    | 0.01      | -0.94 | 0.35 |
| 163 | d) Chile | privacyconcern          | 3                           | -0.00    | 0.01      | -0.04 | 0.97 |
| 164 | d) Chile | privacyconcern          | 9                           | 0.02     | 0.03      | 0.71  | 0.48 |
| 165 | d) Chile | livingstandexp          | 4                           | 0.00     |           |       |      |
| 166 | d) Chile | livingstandexp          | 1                           | 0.00     | 0.01      | 0.10  | 0.92 |
| 167 | d) Chile | livingstandexp          | 2                           | -0.01    | 0.01      | -1.24 | 0.22 |
| 168 | d) Chile | livingstandexp          | 3                           | 0.00     | 0.01      | 0.35  | 0.72 |
| 169 | d) Chile | livingstandexp          | 9                           | -0.03    | 0.03      | -0.92 | 0.36 |
| 170 | d) Chile | digitalliteracy         | 1                           | 0.00     |           |       |      |
| 171 | d) Chile | digitalliteracy         | 2                           | -0.00    | 0.01      | -0.53 | 0.60 |
| 172 | d) Chile | digitalliteracy         | 3                           | 0.00     | 0.01      | 0.27  | 0.79 |

Table 6: AMCE coefficients - India

|     | BY | feature | level                   | estimate                    | std.error | z    | p          |
|-----|----|---------|-------------------------|-----------------------------|-----------|------|------------|
| 173 | e) | India   | Privacy                 | customize                   | 0.00      |      |            |
| 174 | e) | India   | Privacy                 | gather w/o consent          | 0.08      | 0.03 | 2.86 0.00  |
| 175 | e) | India   | Privacy                 | with consent                | -0.02     | 0.03 | -0.56 0.58 |
| 176 | e) | India   | Job.creation            | no jobs                     | 0.00      |      |            |
| 177 | e) | India   | Job.creation            | benefit College edu         | -0.05     | 0.04 | -1.28 0.20 |
| 178 | e) | India   | Job.creation            | benefit manual labor        | -0.08     | 0.03 | -2.29 0.02 |
| 179 | e) | India   | Job.creation            | jobs benefit all            | -0.07     | 0.04 | -1.92 0.05 |
| 180 | e) | India   | Risk.of.unemployment    | very low unempl risk        | 0.00      |      |            |
| 181 | e) | India   | Risk.of.unemployment    | somewhat low risk           | 0.04      | 0.04 | 1.09 0.28  |
| 182 | e) | India   | Risk.of.unemployment    | somewhat high risk          | 0.07      | 0.04 | 2.05 0.04  |
| 183 | e) | India   | Risk.of.unemployment    | very high risk              | 0.06      | 0.04 | 1.58 0.11  |
| 184 | e) | India   | Example.area.of.use     | advertising                 | 0.00      |      |            |
| 185 | e) | India   | Example.area.of.use     | finance                     | -0.02     | 0.04 | -0.56 0.57 |
| 186 | e) | India   | Example.area.of.use     | production                  | -0.01     | 0.04 | -0.37 0.71 |
| 187 | e) | India   | Example.area.of.use     | medicial                    | -0.01     | 0.04 | -0.32 0.75 |
| 188 | e) | India   | Example.area.of.use     | public service              | -0.01     | 0.04 | -0.32 0.75 |
| 189 | e) | India   | Example.area.of.use     | surveillance/safety         | -0.02     | 0.04 | -0.56 0.57 |
| 190 | e) | India   | Choices.made.in.dilemma | no choices made             | 0.00      |      |            |
| 191 | e) | India   | Choices.made.in.dilemma | humans vs. money            | 0.03      | 0.04 | 0.71 0.48  |
| 192 | e) | India   | Choices.made.in.dilemma | humans vs humans            | -0.00     | 0.04 | -0.02 0.98 |
| 193 | e) | India   | Choices.made.in.dilemma | money vs. money             | -0.04     | 0.04 | -1.17 0.24 |
| 194 | e) | India   | Transparency            | easy to explain             | 0.00      |      |            |
| 195 | e) | India   | Transparency            | nobody can understand       | 0.03      | 0.03 | 1.09 0.28  |
| 196 | e) | India   | Transparency            | only experts can understand | -0.04     | 0.03 | -1.34 0.18 |
| 197 | e) | India   | Discrimination          | neutral                     | 0.00      |      |            |
| 198 | e) | India   | Discrimination          | recreate bias               | 0.03      | 0.03 | 1.26 0.21  |
| 199 | e) | India   | socinsuremajsourc       | 3                           | 0.00      |      |            |
| 200 | e) | India   | socinsuremajsourc       | 1                           | 0.00      | 0.01 | 0.77 0.44  |
| 201 | e) | India   | socinsuremajsourc       | 2                           | -0.00     | 0.00 | -0.05 0.96 |
| 202 | e) | India   | socinsuremajsourc       | 9                           | -0.00     | 0.01 | -0.17 0.86 |
| 203 | e) | India   | privacyconcern          | 4                           | 0.00      |      |            |
| 204 | e) | India   | privacyconcern          | 1                           | -0.01     | 0.02 | -0.90 0.37 |
| 205 | e) | India   | privacyconcern          | 2                           | -0.01     | 0.02 | -0.68 0.50 |
| 206 | e) | India   | privacyconcern          | 3                           | -0.01     | 0.02 | -0.73 0.47 |
| 207 | e) | India   | privacyconcern          | 9                           | 0.00      | 0.02 | 0.16 0.88  |
| 208 | e) | India   | livingstandexp          | 4                           | 0.00      |      |            |
| 209 | e) | India   | livingstandexp          | 1                           | 0.01      | 0.01 | 0.70 0.48  |
| 210 | e) | India   | livingstandexp          | 2                           | -0.00     | 0.01 | -0.32 0.75 |
| 211 | e) | India   | livingstandexp          | 3                           | 0.00      | 0.01 | 0.43 0.67  |
| 212 | e) | India   | livingstandexp          | 9                           | 0.00      | 0.01 | 0.35 0.72  |
| 213 | e) | India   | digitalliteracy         | 1                           | 0.00      |      |            |
| 214 | e) | India   | digitalliteracy         | 2                           | 0.00      | 0.01 | 0.29 0.77  |
| 215 | e) | India   | digitalliteracy         | 3                           | 0.01      | 0.01 | 1.24 0.21  |

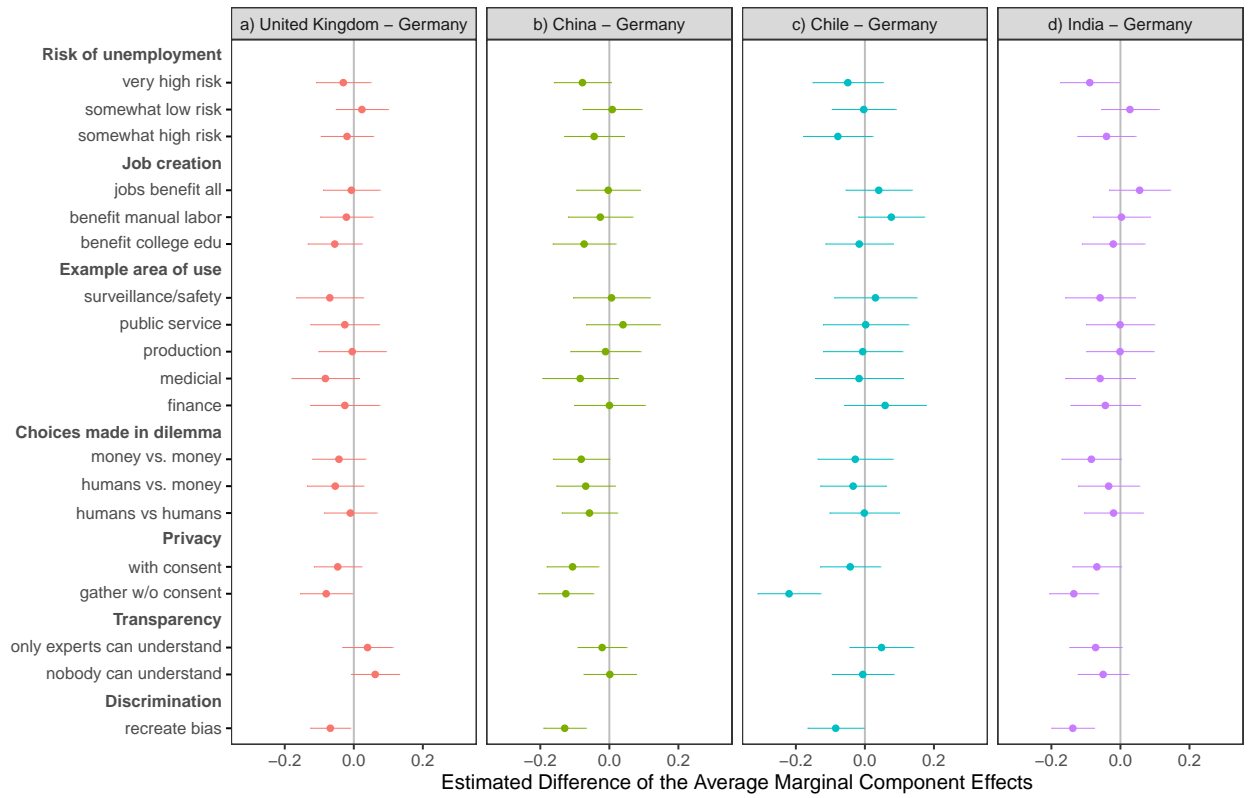

Figure 1: Difference of AMCEs across countries - prohibition choice. Figure shows the differences for this item, with the German sample as a reference. Positive values mean that the effect in Germany is smaller, negative values mean the effect in Germany is larger than the effect in the respective country. Curtailment choice wording: “Which of the algorithms should be prohibited?”

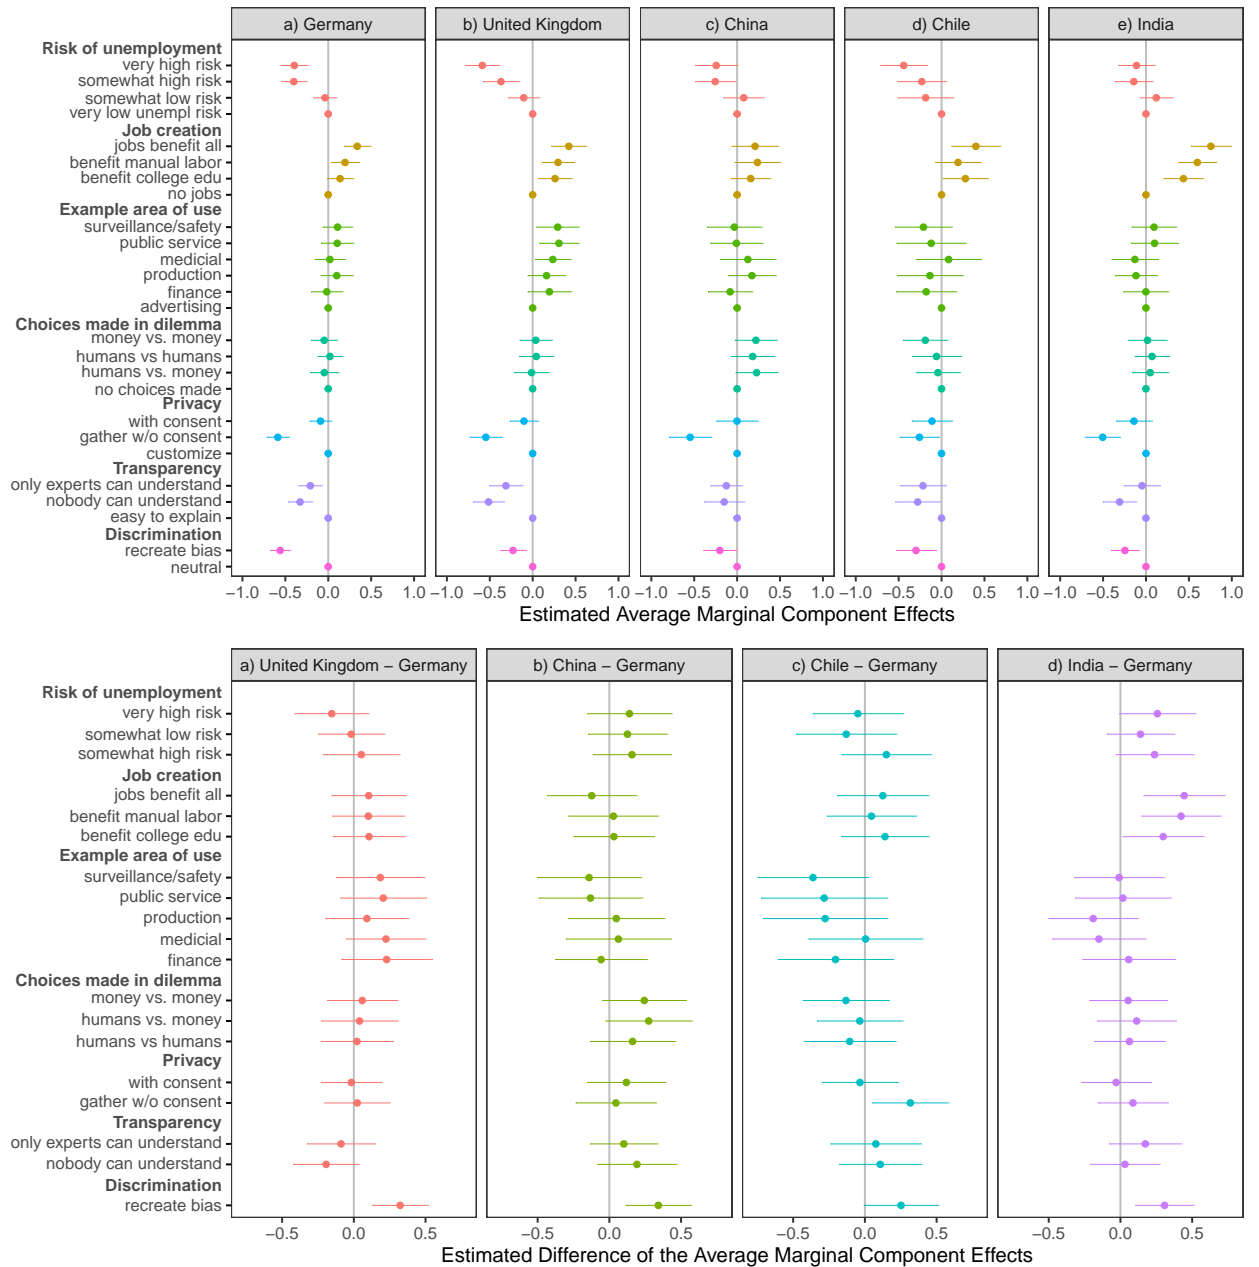

Figure 2: Top panel shows the AMCE effect for the 7 item likert scale ratings. Bottom panel shows the differences for this item, with the German sample as a reference. Likert scale: “On a scale from 1 to 7, where 7 indicates you strongly approve of the algorithm and 1 indicates that you strongly disapprove of the algorithm, how would you rate algorithms 1 and 2?”



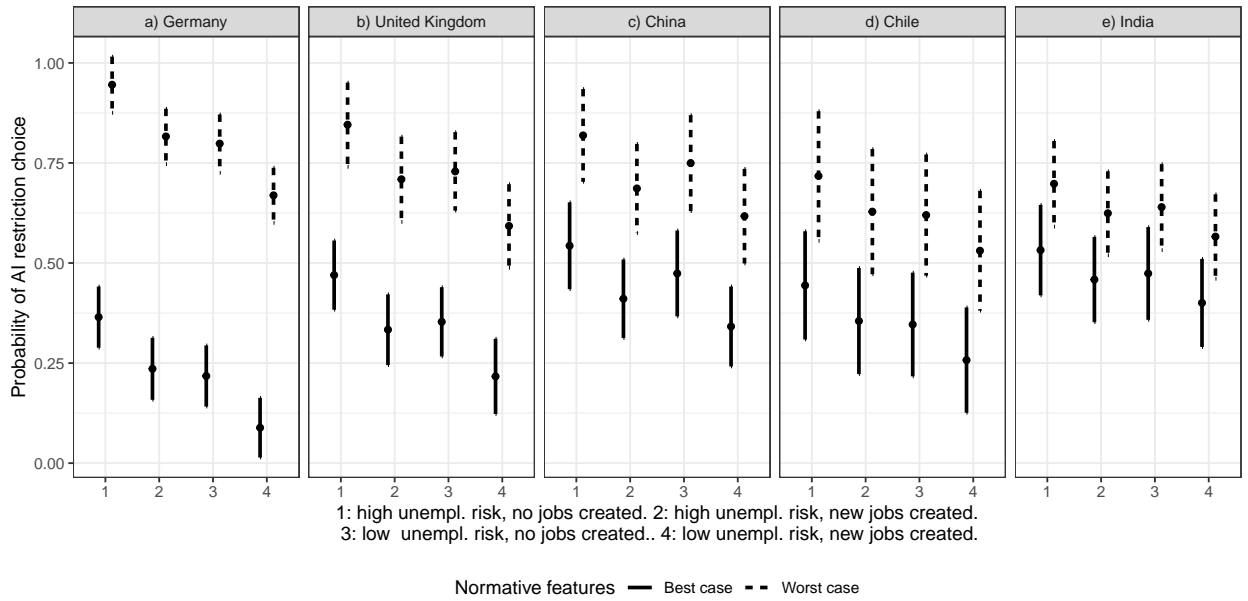

Figure 3: Predicted choices for selected profiles, absolute scale.

## Samples

Participants have been remunerated with a flat fee commensurate with the country and survey time. They were compensated at a rate of 8 GBP per hour or equivalent in Germany and the United Kingdom, adjusted for local rates in China, Chile (75 %), and India (50%). Recruitment was facilitated with quotas for gender and age.

Table 7: Details on data collection. This table shows the source, number and date of the samples collected. Chinese sample contains respondents from Hong Kong and mainland China. Participants with any missing trial choice data observation were removed from data analysis ( $N = 48$ ). Demographic information was collected separately from the experiment, as part of a comparative time-sharing experiments initiative hosted at CESS Nuffield. For China, no additional demographic information was collected.

| Country        | Number of respondents | Source                    | Data collection date |
|----------------|-----------------------|---------------------------|----------------------|
| United Kingdom | 202                   | University panel provider | Spring 2019          |
| Germany        | 298                   | Clickworkers              | Summer 2020          |
| China          | 156                   | Microworkers              | Spring 2019          |
| Chile          | 101                   | University panel provider | Summer 2019          |
| India          | 175                   | University panel provider | Spring 2019          |

## Occupations

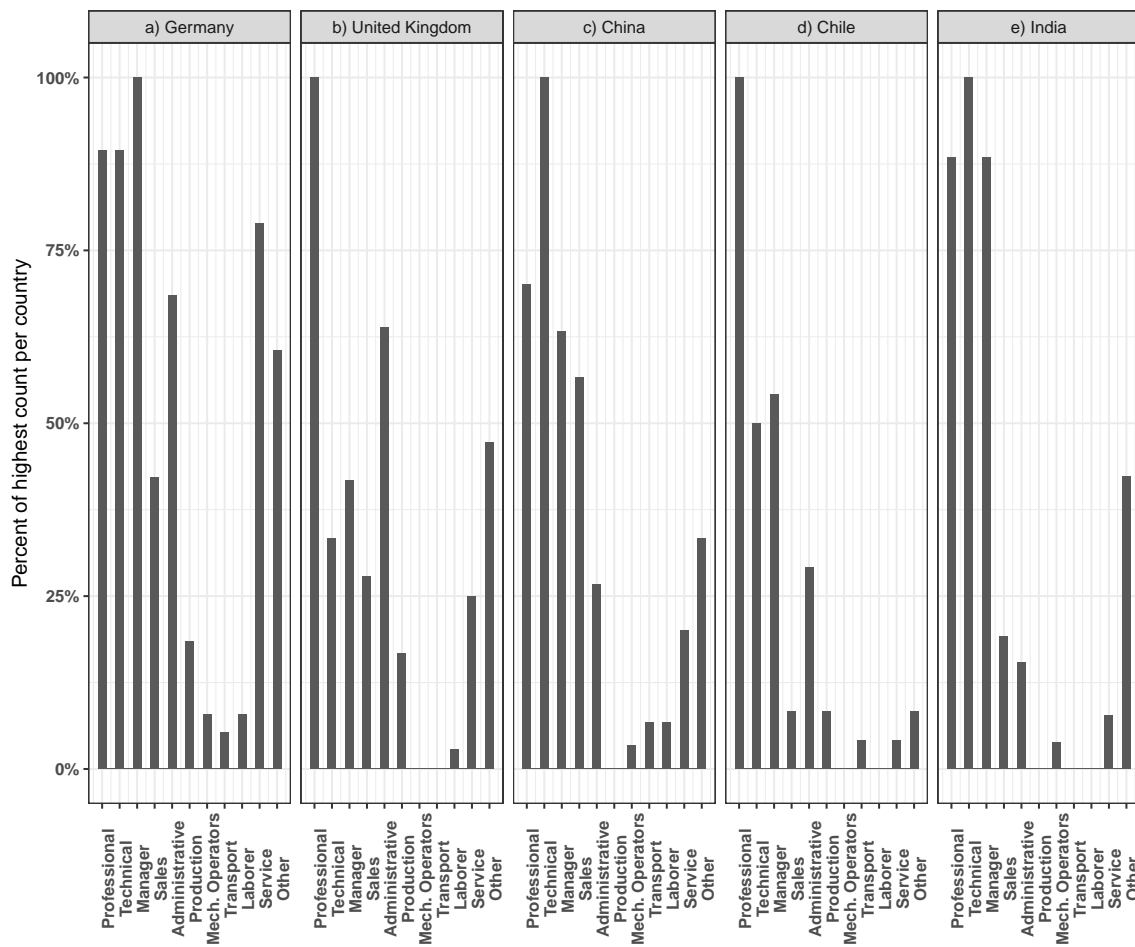

Figure 4: Shows the distribution, in percent of highest response count per country, of the self-reported occupations of respondents. Based on *occupation* variable.

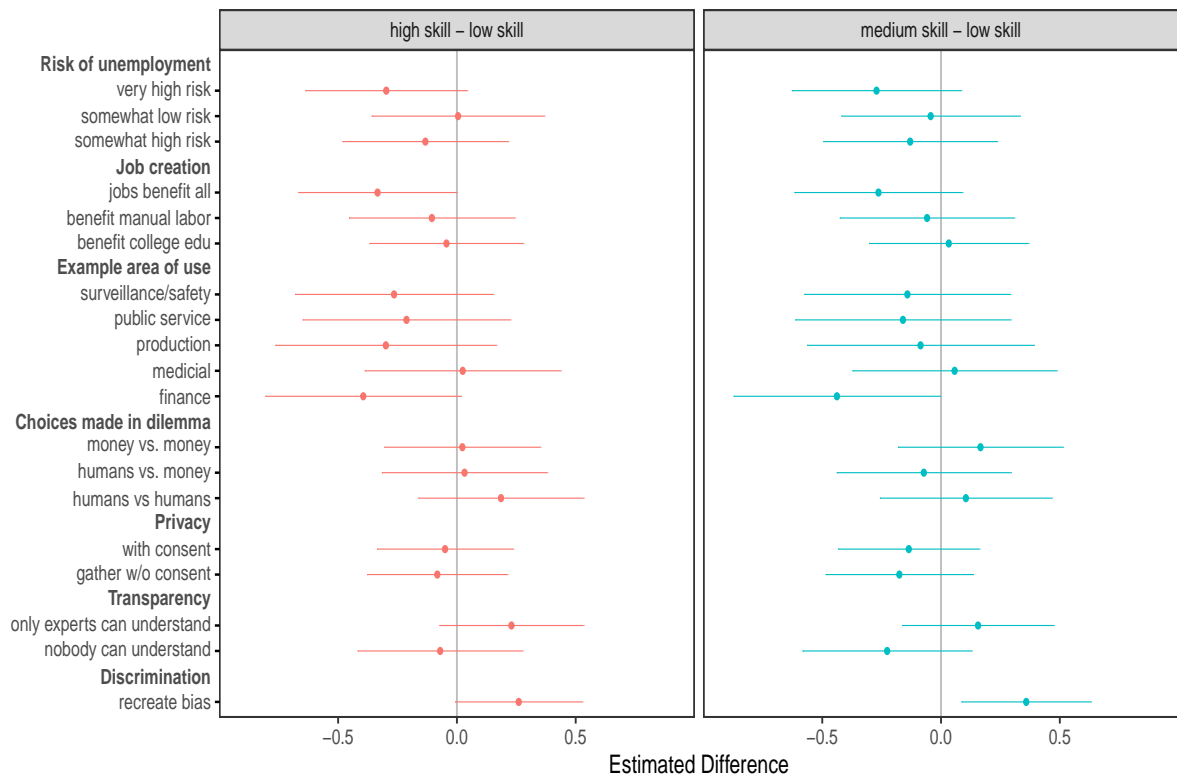

Figure 5: Differences of the AMCE, by skill level, with "high skills" being the reference comparison. Shows the respective difference of AMCEs. Coding scheme based on the *occupation* variable (see attached questionnaire, page 7): professional, technical, executive: high skilled; sales, administrative, machine operator: medium skilled; provision, transportation, handlers, services: low skilled. Pooled over all 5 samples.

## Profile order effects ?

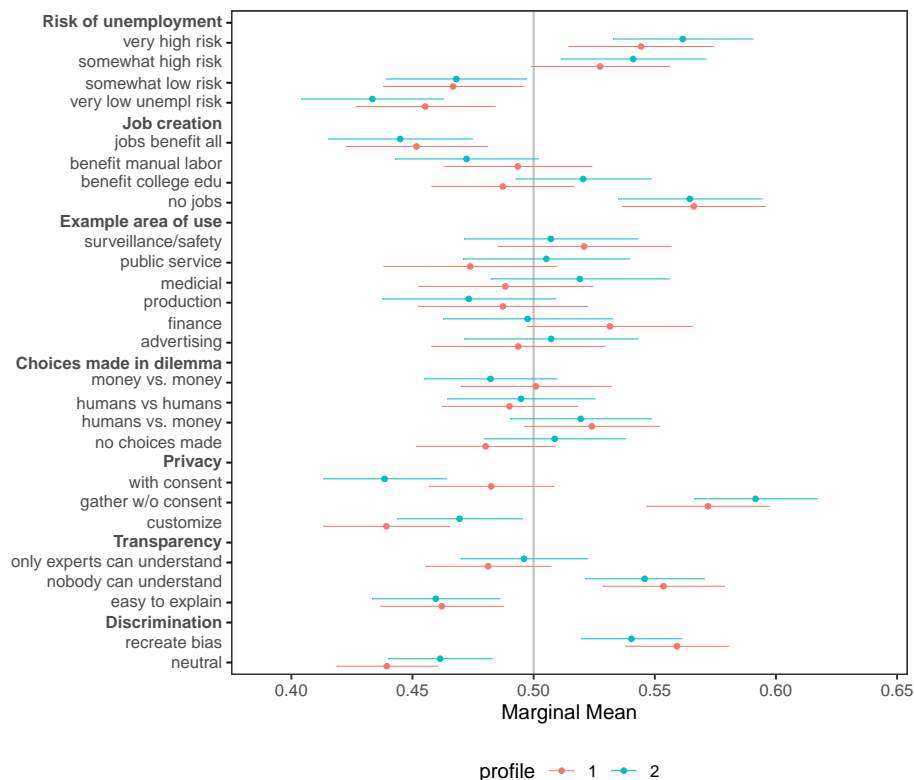

Figure 6: Profile order effects. Marginal mean estimation for the treatment effects, by

# AI Literacy

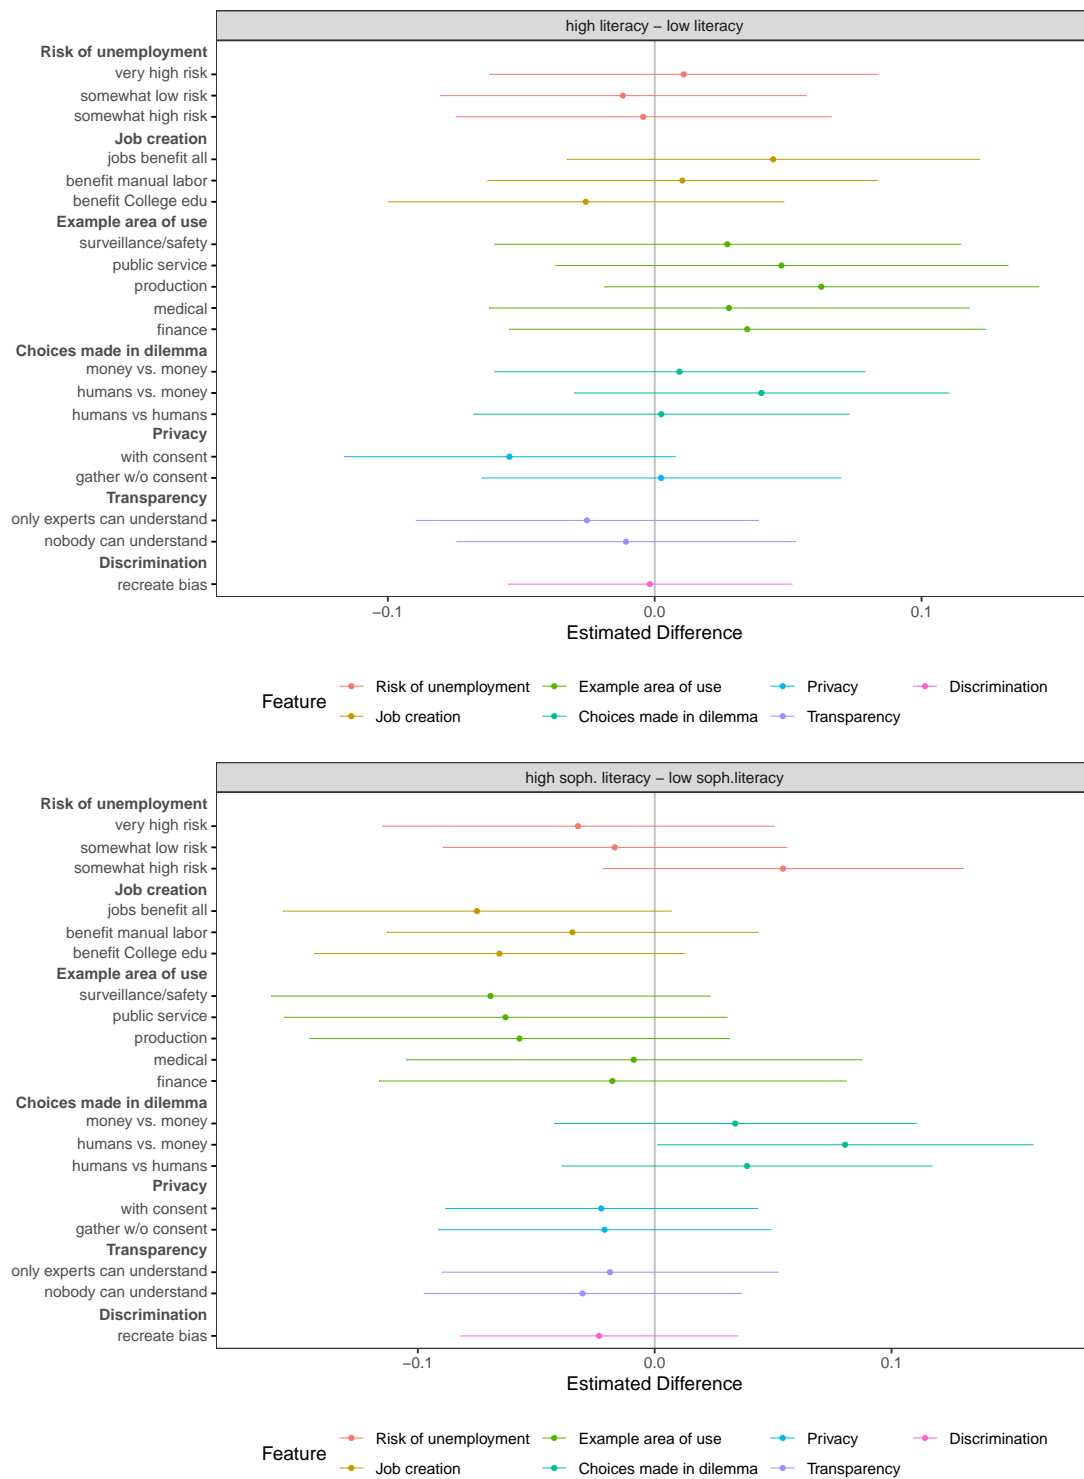

Figure 7: Using pooled sample. Top panel: difference of the treatment effect for a binary version of the “digitalliteracy” variable, taking its median at the cutpoint. Values larger than 0 imply that high digital literacy individuals are more likely to prefer the prohibition an algorithm with the feature in question than individuals with low digital literacy would prefer. Bottom panel for differences of the treatment effect based on a binary version of the “aiknowledge” variable.

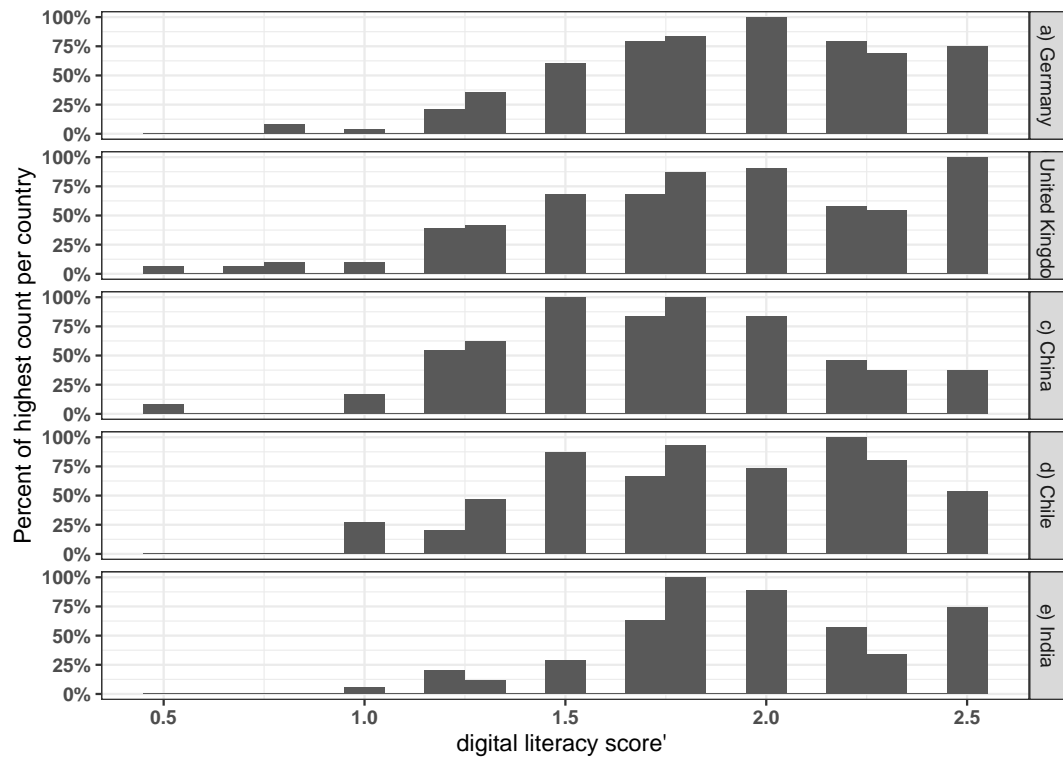

Figure 8: Shows the distribution of digital literacy scores, which is the per respondent mean of items (1) to (6) of the digital-literacy instrument.

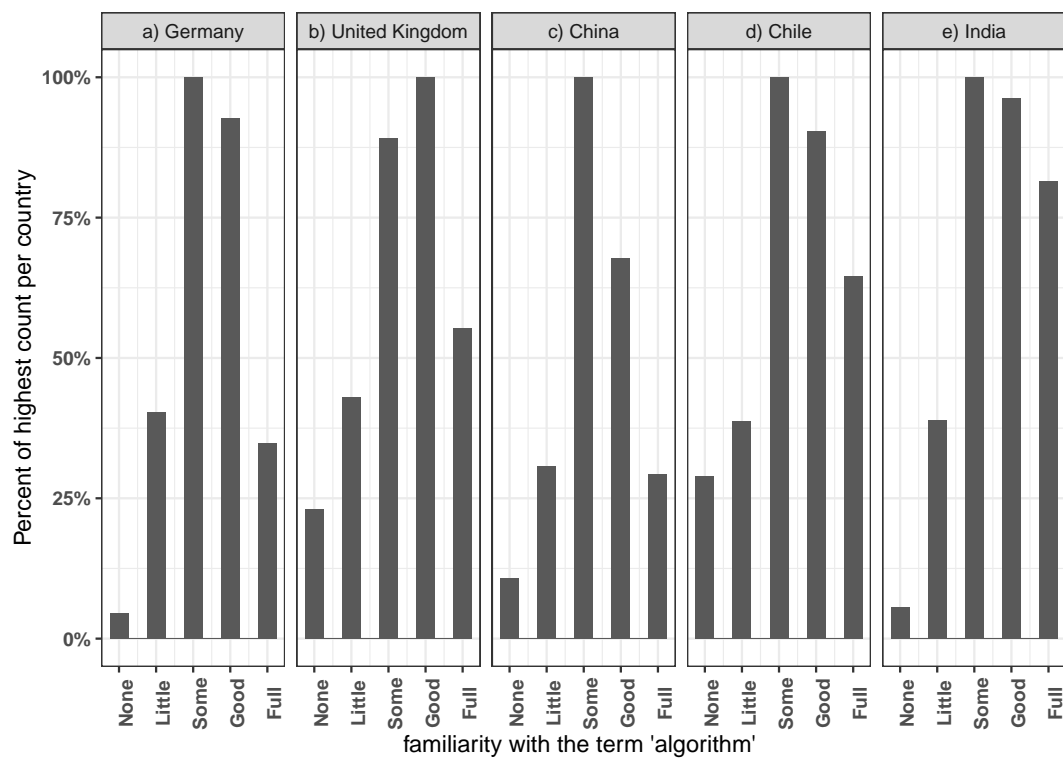

Figure 9: Shows the distribution of the self-reported familiarity with the term “algorithm”.

## Questionnaire

Respondents were presented with a simple online questionnaire, which started after signing an electronic consent form. This study was a module of a multi-investigator time sharing study. Interview languages were English for the UK, India and China, targeting an educated audience in mainland China and Hong Kong. Spanish was used for Chile and German for Germany. In average, it took ca. 3 minutes to conclude the study. The first page introducing the term “algorithm” did not let respondents proceed until after 30 seconds.

We attach the questionnaire on the following page.

## Questionnaire Items

The following pages will show you information on **algorithms** used by computers and software in the internet. An **algorithm** is a list of rules a computer program follows in order to solve a problem.

Some algorithms can teach a computer how to get better at solving problems. For example internet search engines are using "smart" algorithms to improve their ability to find websites. Researchers predict that "smart" algorithms will be able to do many things in the future. Some algorithms will help to guide self-driving cars, while other algorithms will potentially replace office workers. We are interested in your opinion on such learning algorithms. We are going to show you two algorithms with different abilities. We want specifically to know, which one of two

different algorithms you think should be banned by the government.

### Example Choice page

Please carefully review the options detailed below, then please answer the questions.

Which of the algorithms should be prohibited ?

|                                | Algorithm 1                                                                 | Algorithm 2                                                                                            |
|--------------------------------|-----------------------------------------------------------------------------|--------------------------------------------------------------------------------------------------------|
| <b>Discrimination</b>          | Somewhat high risk to recreate human biases and discrimination              | Acts neutral without bias or discrimination                                                            |
| <b>Risk of unemployment</b>    | Somewhat high risk of unemployment for you and others due to automatization | Somewhat high risk of unemployment for you and others due to automatization                            |
| <b>Example area of use</b>     | Medical decisions on health and wellbeing                                   | Financial services and banking                                                                         |
| <b>Choices made in dilemma</b> | Chooses between helping humans OR saving money expenses                     | Chooses between saving one sort of expense OR saving another sort of expense                           |
| <b>Job creation</b>            | Creates new jobs that benefit all professions and occupations               | Creates new jobs that benefit manual labor and non-College occupations - for example robotics operator |
| <b>Transparency</b>            | Nobody can understand how decisions are made                                | Only experts can understand algorithm                                                                  |
| <b>Privacy</b>                 | Gathers personal information without consent                                | Can customize whether personal information collected or not                                            |

var curtailment choice

Which of the algorithms should be prohibited ?

Algorithm 1

☐

Algorithm 2

☐

var likert\_item

On a scale from 1 to 7, where 7 indicates that you strongly approve of the algorithm and 1 indicates that you strongly disapprove of the algorithm, how would you rate algorithms 1 and 2?

1 = you strongly **disapprove** of the algorithm

7 = strongly **approve** of the algorithm

|             | Strongly Disapprove<br>1 | 2                     | 3                     | 4                     | 5                     | 6                     | Strongly Approve<br>7 |
|-------------|--------------------------|-----------------------|-----------------------|-----------------------|-----------------------|-----------------------|-----------------------|
| Algorithm 1 | <input type="radio"/>    | <input type="radio"/> | <input type="radio"/> | <input type="radio"/> | <input type="radio"/> | <input type="radio"/> | <input type="radio"/> |
| Algorithm 2 | <input type="radio"/>    | <input type="radio"/> | <input type="radio"/> | <input type="radio"/> | <input type="radio"/> | <input type="radio"/> | <input type="radio"/> |



Notes for following variables: non-response possible / skip after reminder

var digitalliteracy: average of items (1) to (6)  
var aiknowledge: average of items (7) to (8)

[Collect 5 choices per participants]  
How familiar are you with the following computer and Internet-related items? Please choose a number between 1 and 5 where 1 represents “no understanding” and 5 represents “full understanding” of the item.”

|                             | None (1) (1)          | Little (2) (2)        | Some (3) (3)          | Good (4) (4)          | Full (5) (5)          |
|-----------------------------|-----------------------|-----------------------|-----------------------|-----------------------|-----------------------|
| Advanced Search (1)         | <input type="radio"/> |
| PDF (2)                     | <input type="radio"/> |
| Spyware (3)                 | <input type="radio"/> |
| Wiki or Baike (4)           | <input type="radio"/> |
| Cache (5)                   | <input type="radio"/> |
| Pishing (6)                 | <input type="radio"/> |
| Algorithm (7)               | <input type="radio"/> |
| Artificial Intelligence (8) | <input type="radio"/> |

End of Block: Questionnaire

Start of Block: Context / work

var livingstandexp

Looking forward to the next three years, how confident do you feel about being able to keep your current living standard ?

- ☐ Very confident (1)
  - ☐ Confident (2)
  - ☐ Somewhat confident (3)
  - ☐ Not confident (4)
  - ☐ Refuse to Answer / Don't know (5)
- 

var socinsuremajsource

In case of unemployment, how much do you expect to rely on Government Welfare or Unemployment Insurance -- will it be a major source of income, a minor source of income or not a source at all?

- ☐ Major source (1)
  - ☐ Minor source (2)
  - ☐ Not a source at all (3)
  - ☐ Refuse to Answer / Don't know (5)
- 

var privacyconcern

Are you concerned about people you do not know obtaining personal information about you from your online activities?

- ☐ Very concerned (1)
  - ☐ Concerned (2)
  - ☐ Somewhat concerned (3)
  - ☐ Not concerned (4)
  - ☐ Refuse to Answer / Don't know (5)
-

var employmentstatus

What is your current employment status?

- ☐ Employed for wages, working 35 hours or more per week (1)
- ☐ Employed for wages, working 1-34 hours per week (2)
- ☐ Self-employed (12)
- ☐ Not employed and looking for work (13)
- ☐ Not employed and not looking for work (3)
- ☐ Student (4)
- ☐ Homemaker (5)
- ☐ Disabled, unable to work (6)
- ☐ Other (7) \_\_\_\_\_
- ☐ Don't want to answer (8)

var subject if student

What subject area are your studies in?

- ☐ Education (1)
- ☐ Humanities and Arts (e.g. languages, History) (2)
- ☐ Social Science (e.g. Politics, Psychology) (3)
- ☐ Business, Economics (4)
- ☐ Law (5)
- ☐ Medicine (6)
- ☐ Science (e.g. Biology, Physics, Maths) (7)
- ☐ Computer Science (8)
- ☐ Engineering (9)
- ☐ Agriculture (10)
- ☐ Other: (11) \_\_\_\_\_

---

*Display This Question:*

*If What is your current employment status? = Employed for wages, working 35 hours or more per week*

*Or What is your current employment status? = Employed for wages, working 1-34 hours per week*

*Or What is your current employment status? = Self-employed*

var occupation

What is your occupation?

- ☐ Professional: e.g. Teachers, Lawyers, Social Scientists, Natural Scientists, Doctors (1)
- ☐ Technical: e.g. Engineers, Computer Scientists (2)
- ☐ Executive, Administrative and Managerial: e.g. Managers, CEOs, Accountants (3)
- ☐ Sales: e.g. Cashier, Sales Workers (4)
- ☐ Administrative support: e.g. Secretaries, Supervisors, Receptionists (5)
- ☐ Prevision production, Craft and Repair: e.g. Mechanics, Construction workers, Tailors, Bakers, Shoe Repairers (6)
- ☐ Machine Operators, Assemblers and Inspectors (7)
- ☐ Transportation: Bus driver, Truck driver, Taxi driver, Operating Engineers (8)
- ☐ Handlers, Equipment Cleaners, Helpers and Laborers (9)
- ☐ Service Occupations: Police, Public Service, Cook, Waiter, Janitors, Cleaners, Hairdresser (10)
- ☐ Other: (11) \_\_\_\_\_
